# Supplementary material for: Exchange of amino acids in the H1-haemagglutinin to H3 residues is required for efficient influenza A virus replication and pathology in Tmprss2 knock-out mice
Source: PubMed Central journal article supplement (PMC6230768; doi:10.1099/jgv.0.001128), 2018-08-06
Supplement: jgv-99-1187-s001.pdf [file jgv-99-1187-s001.pdf]

## Supplements

### Exchange of amino acids in the H1-hemagglutinin to H3 residues is required for efficient influenza A virus replication and pathology in *Tmprss2* knock-out mice

Ruth L.O. Lambertz<sup>1</sup>, Jan Pippel<sup>2</sup>, Ingo Gerhauser<sup>3</sup>, Heike Kollmus<sup>1</sup>, Darisuren Anhlan<sup>4</sup>, Eike R. Hrncius<sup>4</sup>, Joern Krausze<sup>2</sup>, Nora Kühn<sup>1</sup>, Klaus Schughart<sup>1,5,6,#</sup>

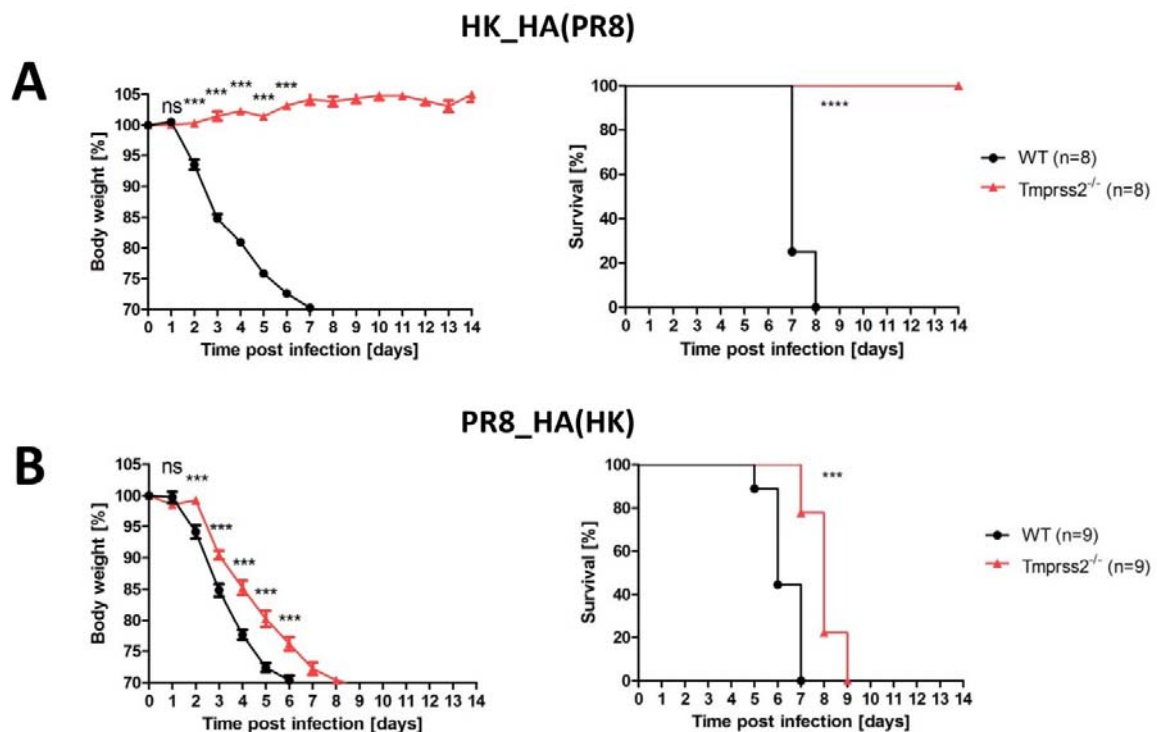

### FIG S1: HA determines resistance phenotype in *Tmprss2*<sup>-/-</sup> mice – lower dose ( $2 \times 10^3$ ffu) infection

Female wild type (WT) and *Tmprss2*<sup>-/-</sup> mice (8-12 weeks old) were infected intranasally with  $2 \times 10^3$ ffu of (A) HK\_HA(PR8) (H1N2), (WT: n=8; KO: n=8) or (B) PR8\_HA(HK) (H3N1) (WT: n=9; KO: n=9) virus and body weight was monitored for 14 days p.i. Left panel: Mean body weight in percent of starting weight  $\pm$  1 SEM. Right panel: Survival graphs. Statistics for body weight loss

were performed only for groups in which more than 50 % of infected mice were still alive. Significances were calculated using repeated measures ANOVA followed by a pair-wise t-test with BH for multiple testing correction. Statistics for survival curves were calculated with the log rank test. Stars indicate adjusted p-values \*\*\*  $p < 0.001$ ; \*\*\*\*  $p < 0.0001$ ; ns: non-significant. In addition to mice that were found dead, animals with a body weight loss of more than 30 % of the starting body weight were euthanized and recorded as dead.

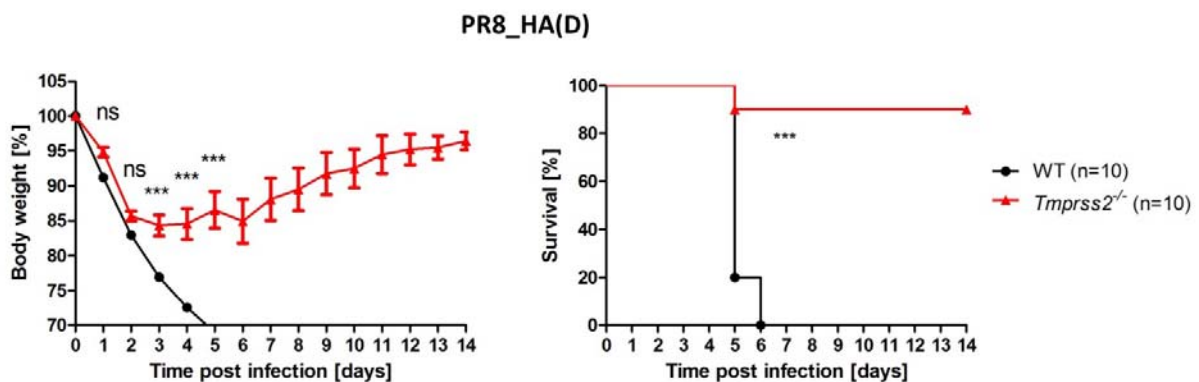

**FIG S2: Single amino acid exchange in PR8\_HA(D) virus does not result in high pathogenic phenotype**

Female wild type (WT, n=10) and *Tmprss2*<sup>-/-</sup> (n=10) mice (8-12 weeks old) were infected intranasally with  $2 \times 10^5$  ffu PR8\_HA(D) virus and body weight was monitored for 14 days p.i.. Left Panel: Mean body weight in percent of starting weight  $\pm$  1 SEM. Right panel: Survival graphs. Statistics for body weight loss were performed only for groups in which more than 50 % of infected mice were still alive. Significances were calculated using repeated measures ANOVA followed by a pair-wise t-test with BH for multiple testing correction. Stars indicate adjusted p-values (\*\*\*)  $p < 0.001$ ; ns: non-significant. In addition to mice that were found dead, animals with

a body weight loss of more than 30 % of the starting body weight were euthanized and recorded as dead.

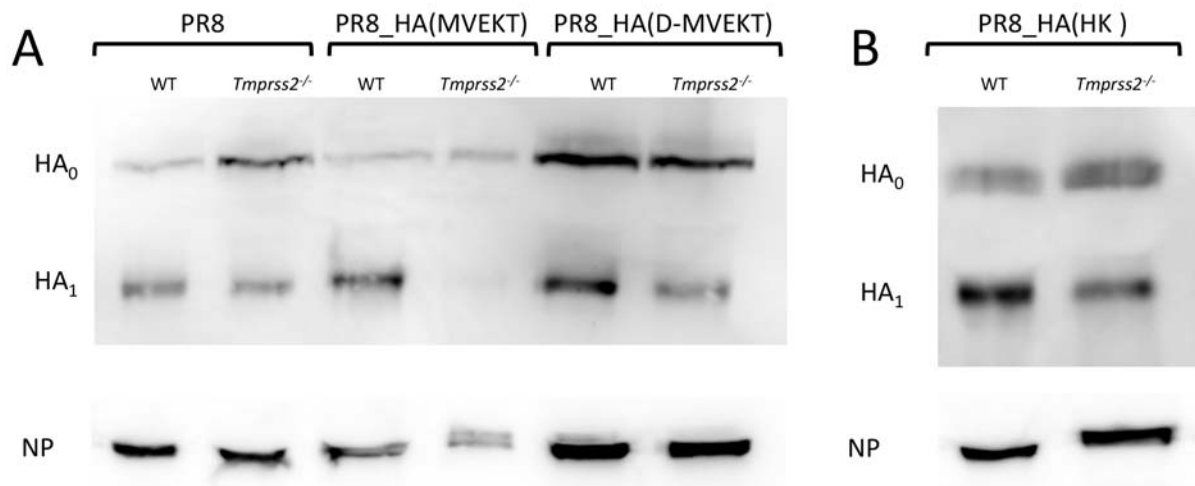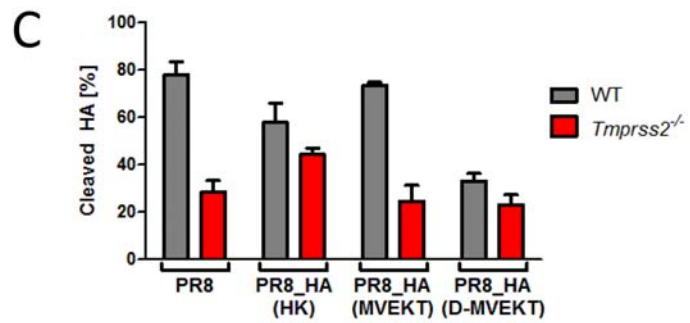

**FIG S3: Cleavage of HA from PR8\_HA(MVEKT) and PR8\_HA(D-MVEKT) viruses in bronchoalveolar lavages (BAL) of infected *Tmprss2*<sup>-/-</sup> mice.**

Female 8-12 week-old WT and *Tmprss2*<sup>-/-</sup> mice were infected intranasally with  $2 \times 10^5$  ffu PR8, PR8\_HA(MVEKT), and PR8\_HA(D-MVEKT), and PR8\_HA(HK). On day 3 p.i., BAL samples were prepared and total protein was quantified. For each sample, 20 $\mu$ g total protein were run on a SDS-PAGE, blotted to a PVDF membrane and stained by (A) anti-H1N1 antibody (PR8), (B) anti-H3N2 antibody (A/Brisbane/10/2007) or anti-NP antibody (corresponding NP bands are shown below each sample in A and B). HA<sub>0</sub>: uncleaved HA, HA<sub>1</sub>: N-terminal part of cleaved HA. Detection of signals was performed using the FujiFilm LAS-3000 imaging system. (C) Cleaved HA is shown as the ratio of  $HA_1 \times 100 / (HA_1 + HA_0)$ . Band intensities of four blots derived from the same BAL sample were analyzed using ImageJ software and the mean was depicted  $\pm$  1 SEM.

Mutagenesis primer

| HA modification | Primer name | Sequence in 5'->3' orientation                                     | template plasmid | resulting plasmid |
|-----------------|-------------|--------------------------------------------------------------------|------------------|-------------------|
| EKT             | Mut EKT F   | 5'-GGTTACAGGACTAAGGAACATTCCGGA<br>GAAGCAAACCCAGAGGTCTATTTGGAGCC-3' | pHW-HA           | pHW-HA(EKT)       |
|                 | Mut EKT R   | 5'-GGCTCAAATAGACCTCTGGTTTGCTT<br>CTCCGGAATGTTCTTAGTCCTGTAACC-3'    |                  |                   |
| MVEKT           | Mut MVEKT F | 5'-CCAAATTGAGGATGGTTACAGGAaTgA<br>GGAACgTTCCGgagAagCAAaCCAGAGG-3'  | pHW-HA(EKT)      | pHW-HA(MVEKT)     |
|                 | Mut MVEKT R | 5'-CCTCTGGtTTGctTctcCGGAAcGTTcCT<br>cAtTCCTGTAACCATCCTCAATTTGG-3'  |                  |                   |
| DMVEKT          | Mut D F     | 5'-CACTGTTGACACAGTACTCGAtAAGAAT<br>GTGACAGTGACACAC-3'              | pHW-HA(MVEKT)    | pHW-HA(DMVEKT)    |
|                 | Mut D R     | 5'-GTGTGTCACTGTCACATTCTTaTCGAGT<br>ACTGTGTCAACAGTG-3'              |                  |                   |
| D               | Mut D F     | 5'-CACTGTTGACACAGTACTCGAtAAGAAT<br>GTGACAGTGACACAC-3'              | pHW-HA           | pHW_HA(D)         |
|                 | Mut D R     | 5'-GTGTGTCACTGTCACATTCTTaTCGAGT<br>ACTGTGTCAACAGTG-3'              |                  |                   |

Cloning primers

| Segment | Name       | Sequence in 5'→3' orientation                       | annealing temperature | elongation time |
|---------|------------|-----------------------------------------------------|-----------------------|-----------------|
| 1       | SLIC PB2 F | 5'-gacctccgaagtgggggggAGCGAAAGCAGGTCAAWTATATTCA-3'  | 58                    | 4 min           |
|         | SLIC20+13R | 5'-ttttgggccccgggttattAGTAGAAACAAGG-3'              | 58                    | 4 min           |
| 2       | SLIC PB1 F | 5'-gacctccgaagtgggggggAGCGAAAGCAGGCAAACCATTTGATG-3' | 58                    | 1 min           |
|         | SLIC PB1 R | 5'-ttttgggccccgggttattAGTAGAAACAAGGCATTTTTTCAYG-3'  | 58                    | 1 min           |
| 3       | SLIC PA F  | 5'-gacctccgaagtgggggggAGCRAAAGCAGGTACTGATYCRAATG-3' | 58                    | 1 min           |
|         | SLIC PA R  | 5'-ttttgggccccgggttattAGTAGAAACAAGGTACTTTTTTGACA-3' | 58                    | 1 min           |
| 4       | SLIC HA F  | 5'-ggtcgacctccgaagtgggggggAGCAAAGCAGGGG-3'          | 60                    | 1.5 min         |
|         | SLIC HA R  | 5'-ggcattttgggccccgggttattAGTAGAAACAAGGGTGT-3'      | 60                    | 1.5 min         |
| 5       | SLIC20+12F | 5'-gacctccgaagtgggggggAGCAAAGCAGG-3'                | 57                    | 1 min           |
|         | SLIC20+13R | 5'-ttttgggccccgggttattAGTAGAAACAAGG-3'              | 57                    | 1 min           |
| 6       | SLIC20+12F | 5'-gacctccgaagtgggggggAGCAAAGCAGG-3'                | 58                    | 1 min           |
|         | SLIC20+13R | 5'-ttttgggccccgggttattAGTAGAAACAAGG-3'              | 58                    | 1 min           |
| 7       | SLIC20+12F | 5'-gacctccgaagtgggggggAGCAAAGCAGG-3'                | 58                    | 1 min           |
|         | SLIC20+13R | 5'-ttttgggccccgggttattAGTAGAAACAAGG-3'              | 58                    | 1 min           |
| 8       | SLIC20+12F | 5'-gacctccgaagtgggggggAGCAAAGCAGG-3'                | 57                    | 1 min           |
|         | SLIC20+13R | 5'-ttttgggccccgggttattAGTAGAAACAAGG-3'              | 57                    | 1 min           |
